# Supplementary material for: An efficient route to N-alkylated 3,4-dihydroisoquinolinones with substituents at the 3-position
Source: Royal Society of Chemistry journal article supplement (doi:10.1039/c7ra13627g), 2018-01-01

## Supplementary Data

### An efficient route to N-alkylated 3,4-dihydroisoquinolinones with substituents at the 3-position

Aoi Tazawa,<sup>ab</sup> Junki Ando,<sup>a</sup> Kohei Ishizawa,<sup>a</sup>  
Isao Azumaya,<sup>\*b</sup> Hidemasa Hikawa<sup>b</sup> and Minoru Tanaka,<sup>\*a</sup>

<sup>\*a</sup> Sohyaku Innovative Research Division, Mitsubishi Tanabe Pharma Corporation, 1000 Kamoshida-cho, Aoba-ku,  
Yokohama-shi, Kanagawa 227-0033, Japan

Tel: +81-45-963-7217; fax: +81-45-963-7247

E-mail address: tanaka.minoru@mw.mt-pharma.co.jp

<sup>\*b</sup> Faculty of Pharmaceutical Sciences, Toho University, 2-2-1 Miyama, Funabashi, Chiba 274-8510, Japan

Tel: +81-47-472-1589; fax: +81-47-472-1595

E-mail address: isao.azumaya@phar.toho-u.ac.jp

#### Table of Contents.

#### S2 General Information

#### S3-S11 NMR Spectra of compounds

**General Information.**  $^1\text{H}$  and  $^{13}\text{C}$  NMR spectra were recorded on a Bruker 400 ULTRASHIELD PLUS.  $^1\text{H}$  and  $^{13}\text{C}$  chemical shifts are reported in ppm downfield from tetramethylsilane (TMS,  $\delta$  scale) with the solvent resonances as internal standards. The following abbreviations were used to explain the multiplicities: s, singlet; d, doublet; t, triplet; q, quartet; m, multiplet; band, several overlapping signals; br, broad. IR spectra were recorded on a PerkinElmer Spectrum One FT-IR Spectrometer using attenuated total reflection (ATR). Melting points (m.p.) were recorded on a BÜCHI Melting Point B-545. Mass spectra were provided at the DMPK Research Laboratory, Mitsubishi Tanabe Pharma Corporation.

***N*-(1-(2-Bromophenyl)-2-methylpropan-2-yl)formamide (7).**

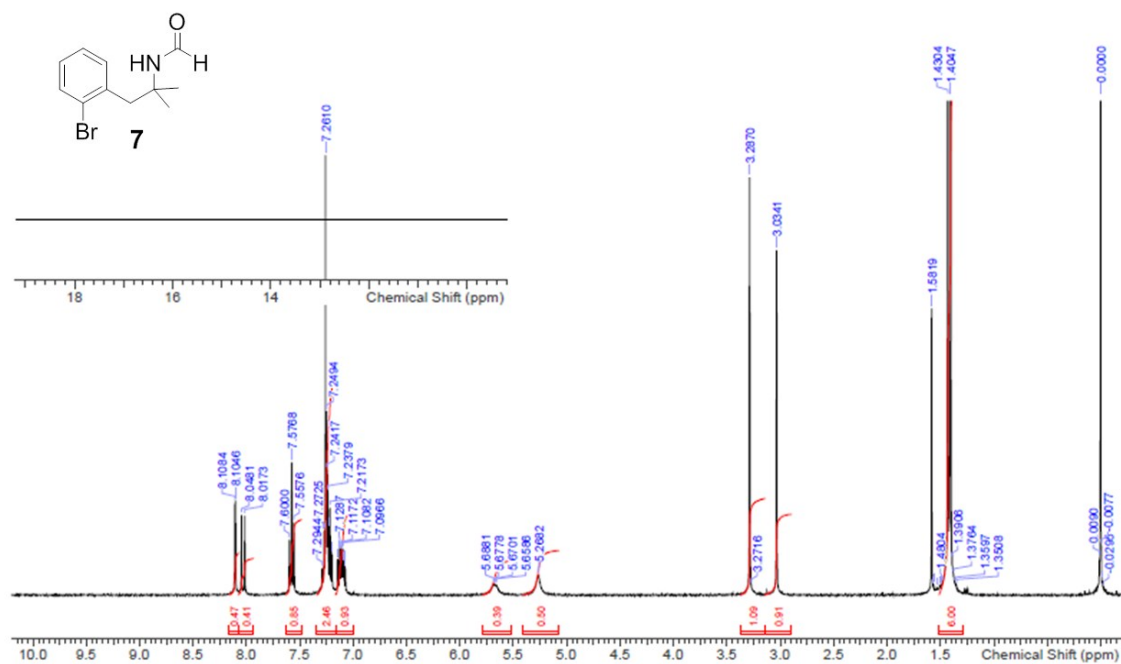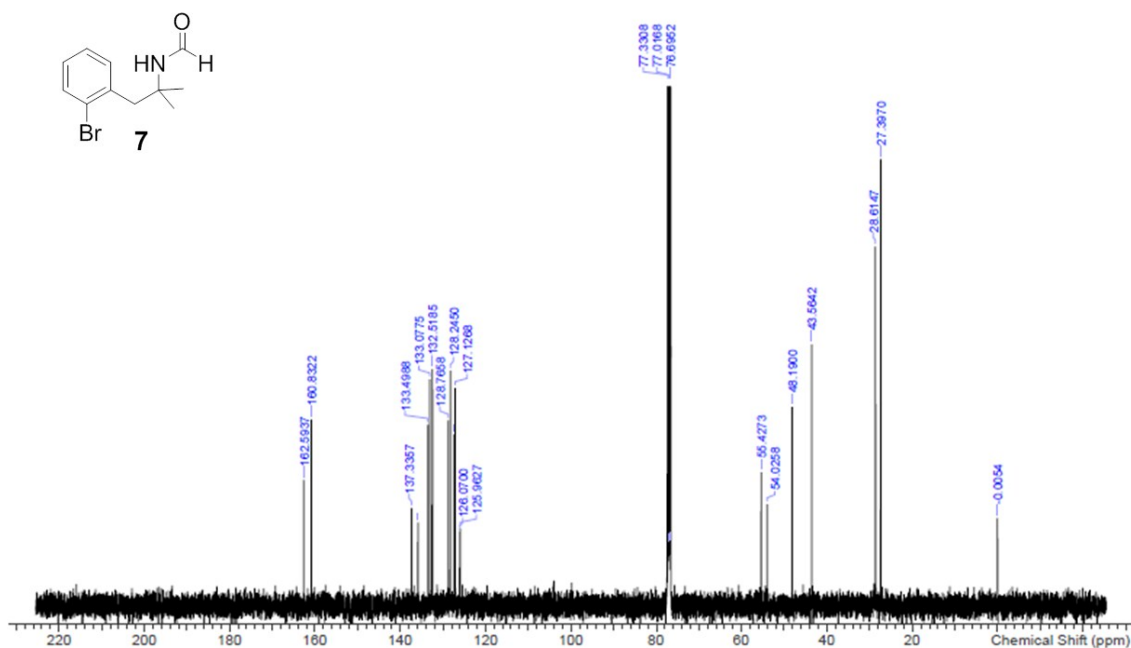

5-Bromo-2-(2-methoxy-2-oxoethyl)-3,3-dimethyl-3,4-dihydro-isoquinolin-2-ium bromide (9).

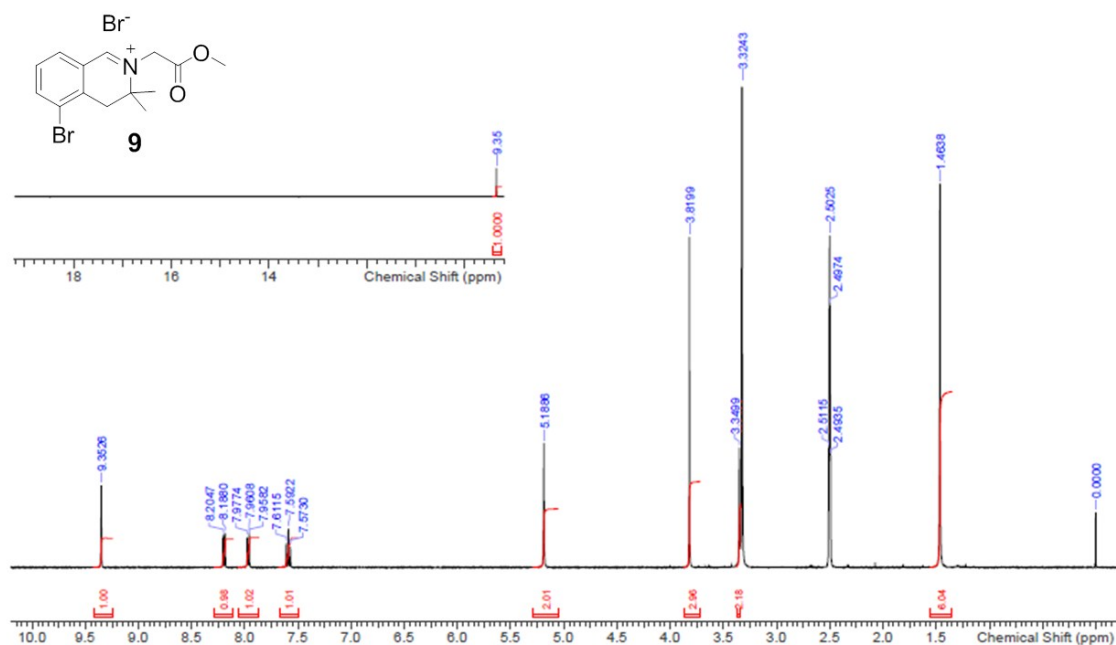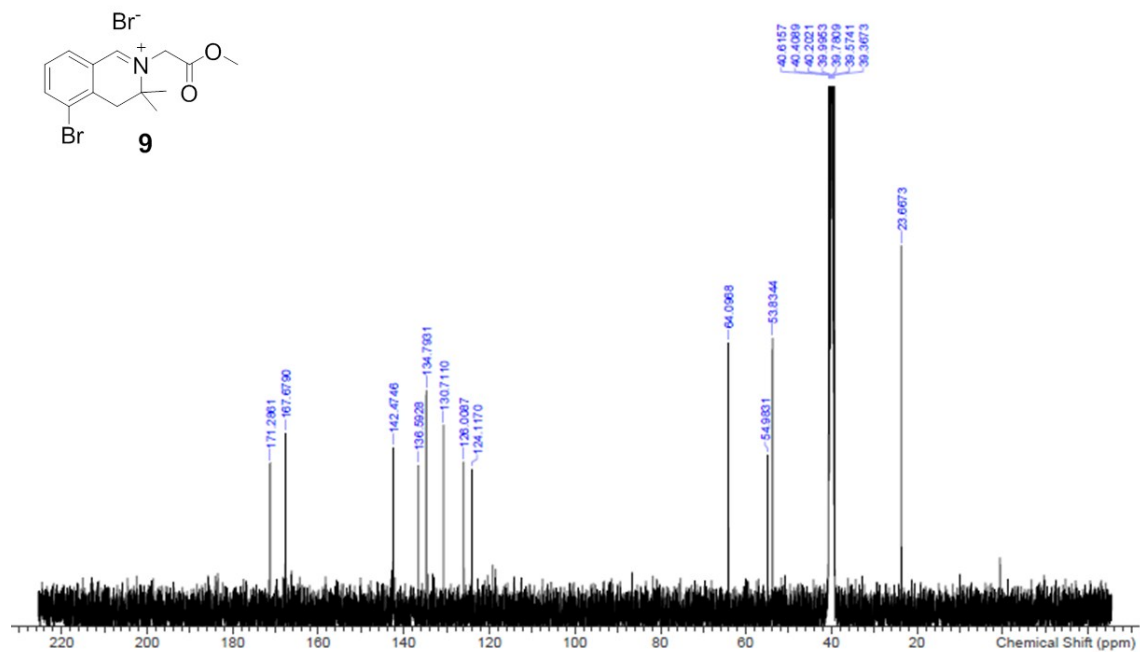

Methyl 2-(5-bromo-3,3-dimethyl-1-oxo-3,4-dihydroisoquinolin-2(1H)-yl)acetate (10).

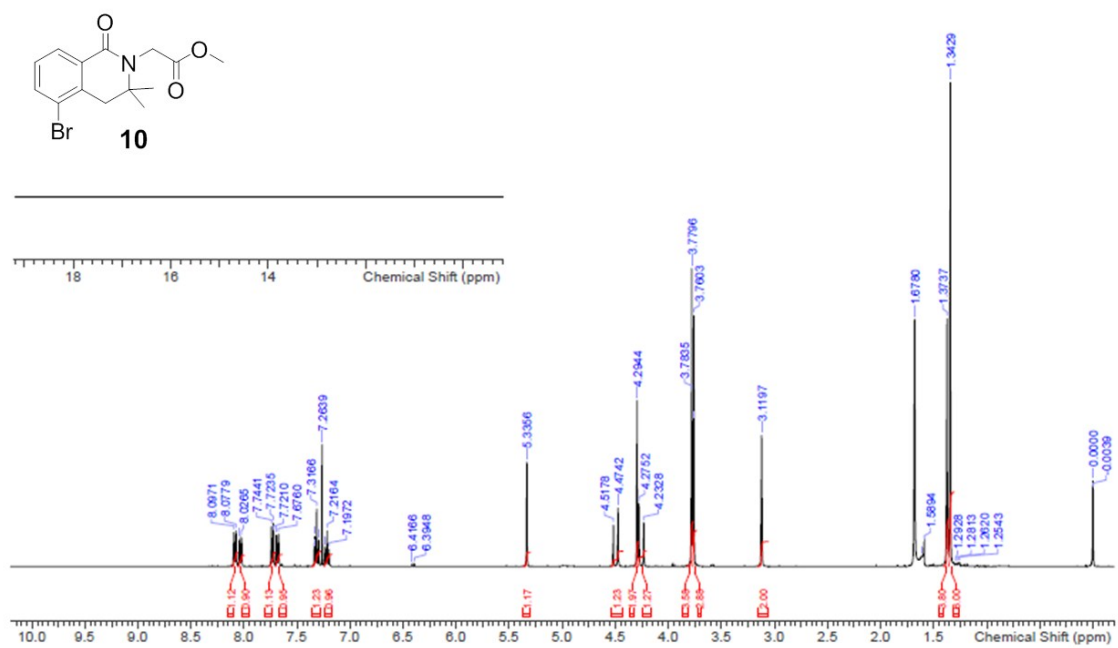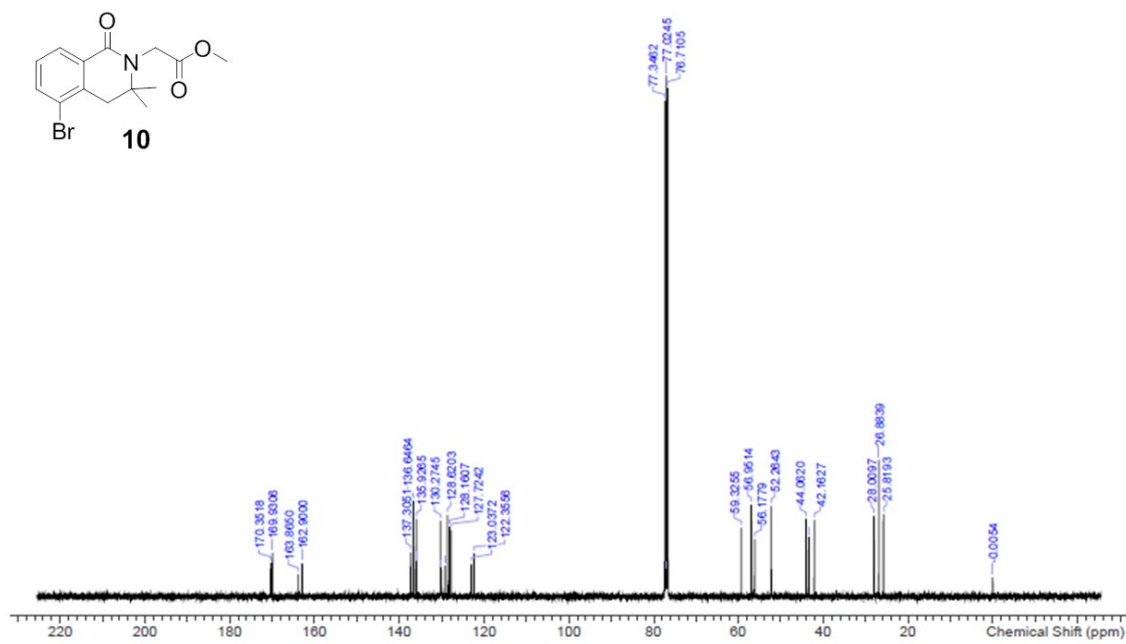

2-(5-Bromo-3,3-dimethyl-1-oxo-3,4-dihydroisoquinolin-2(1H)-yl)acetic acid (11).

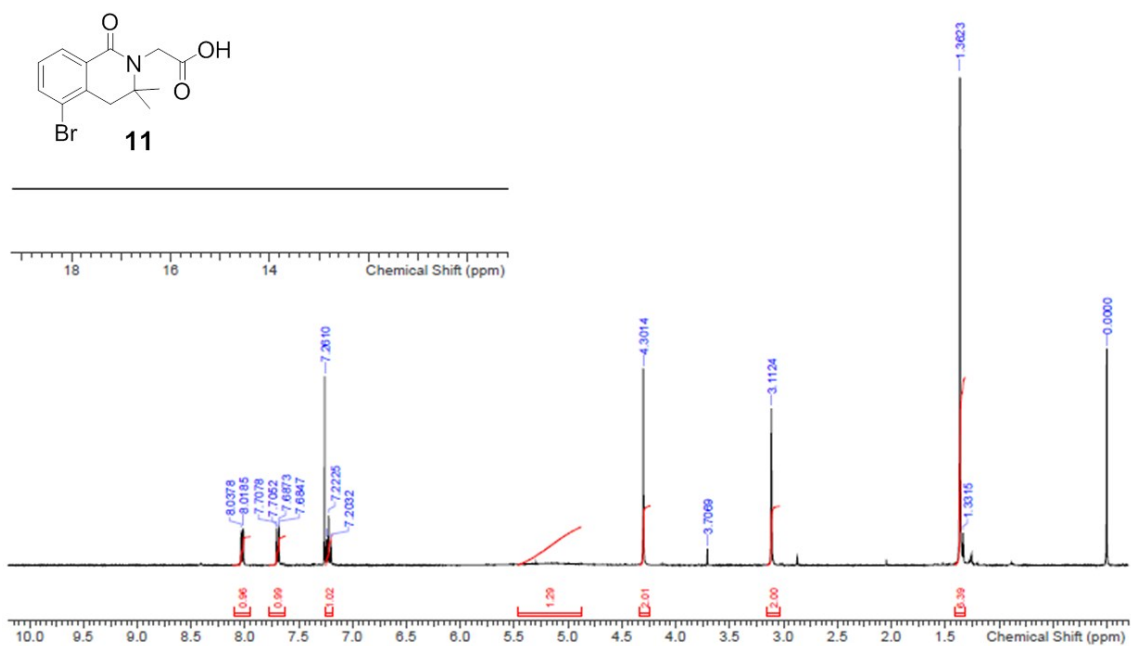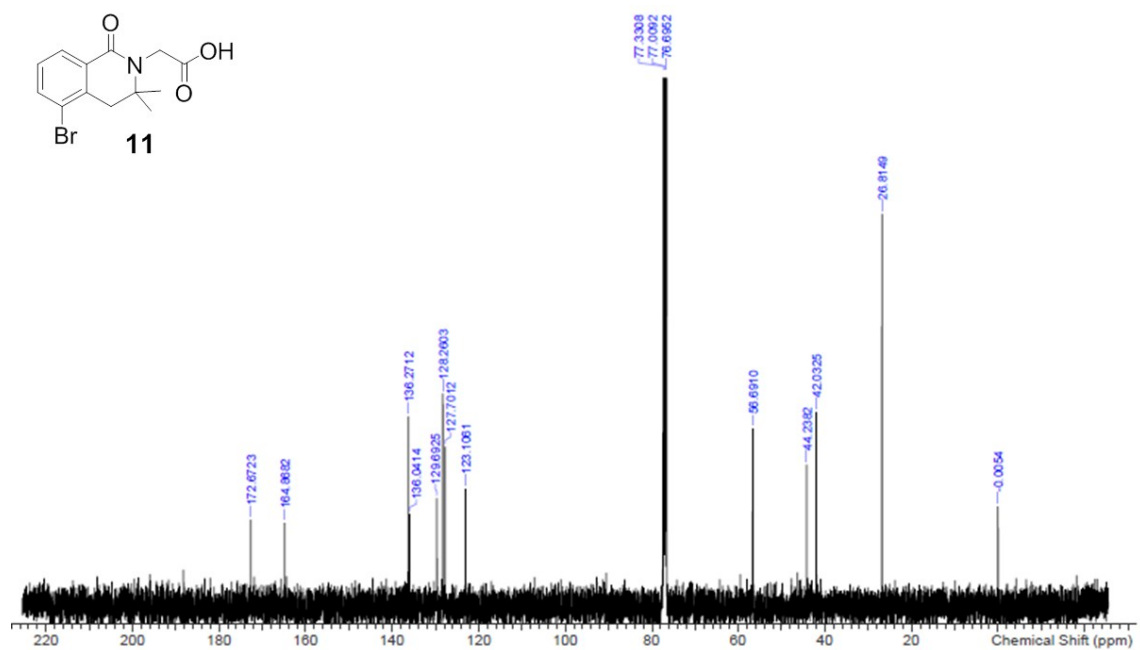

5-Bromo-2,3,3-trimethyl-3,4-dihydroisoquinolin-2-ium iodide (12).

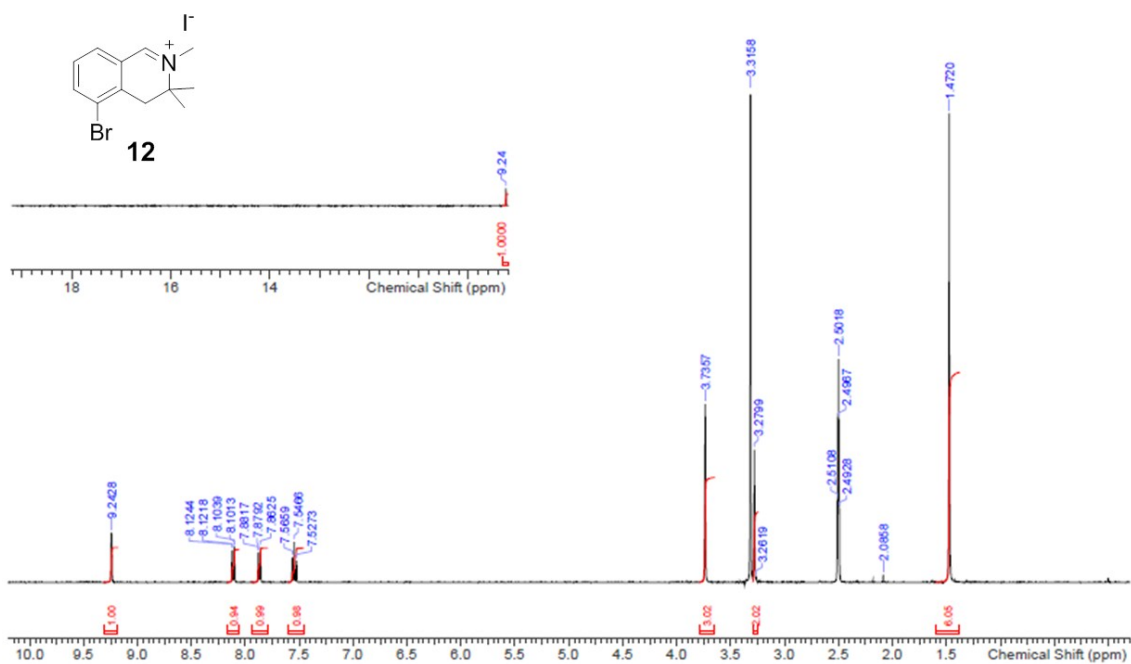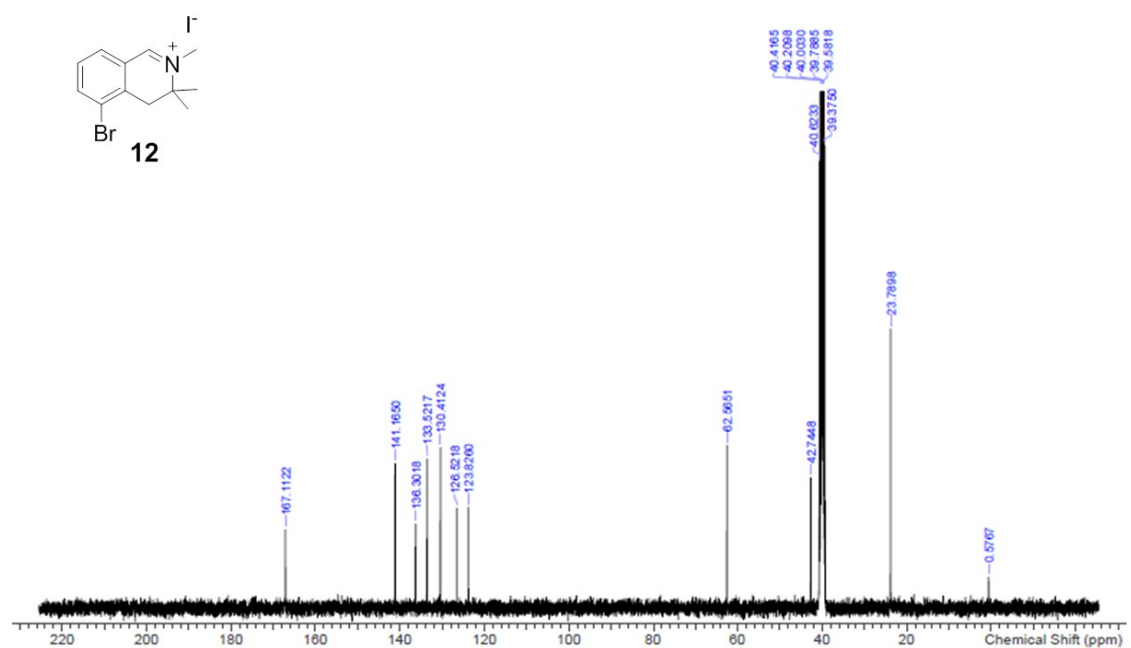

5-Bromo-2,3,3-trimethyl-3,4-dihydroisoquinolin-1(2H)-one (13).

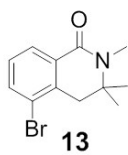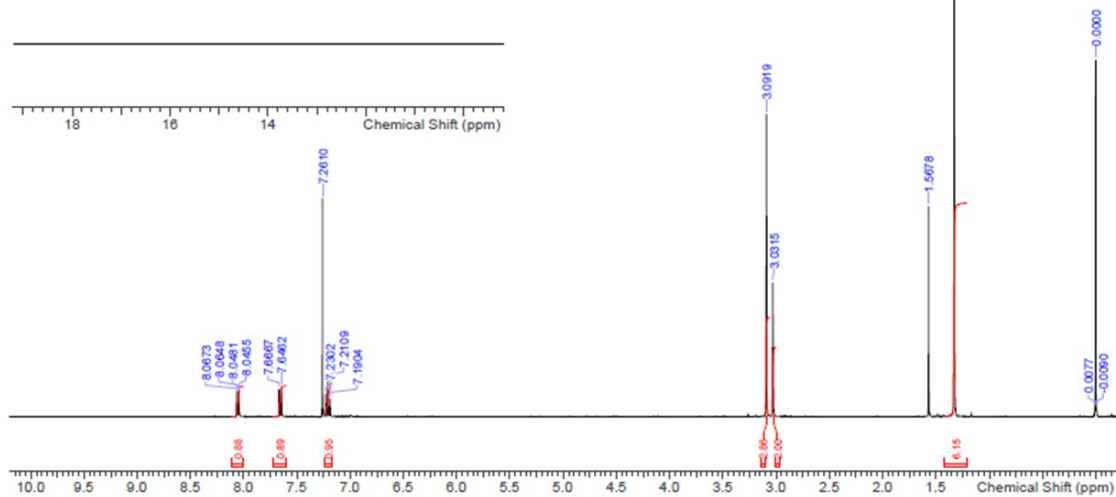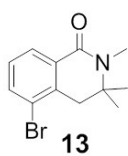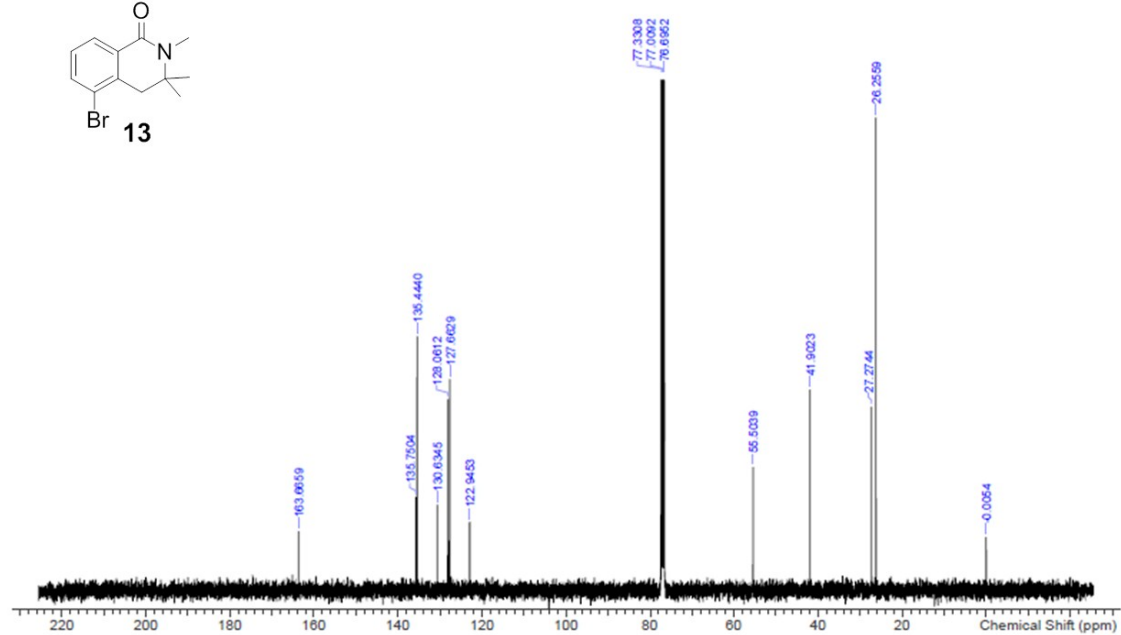



2-Benzyl-5-bromo-3,3-dimethyl-3,4-dihydroisoquinolin-2-ium bromide (14).

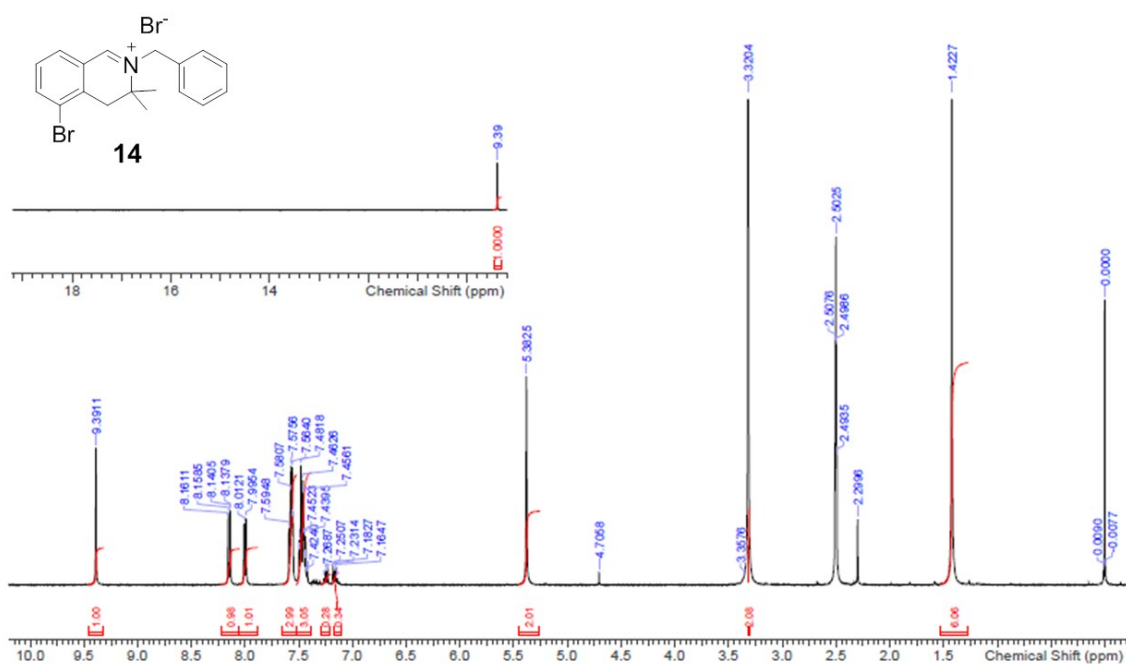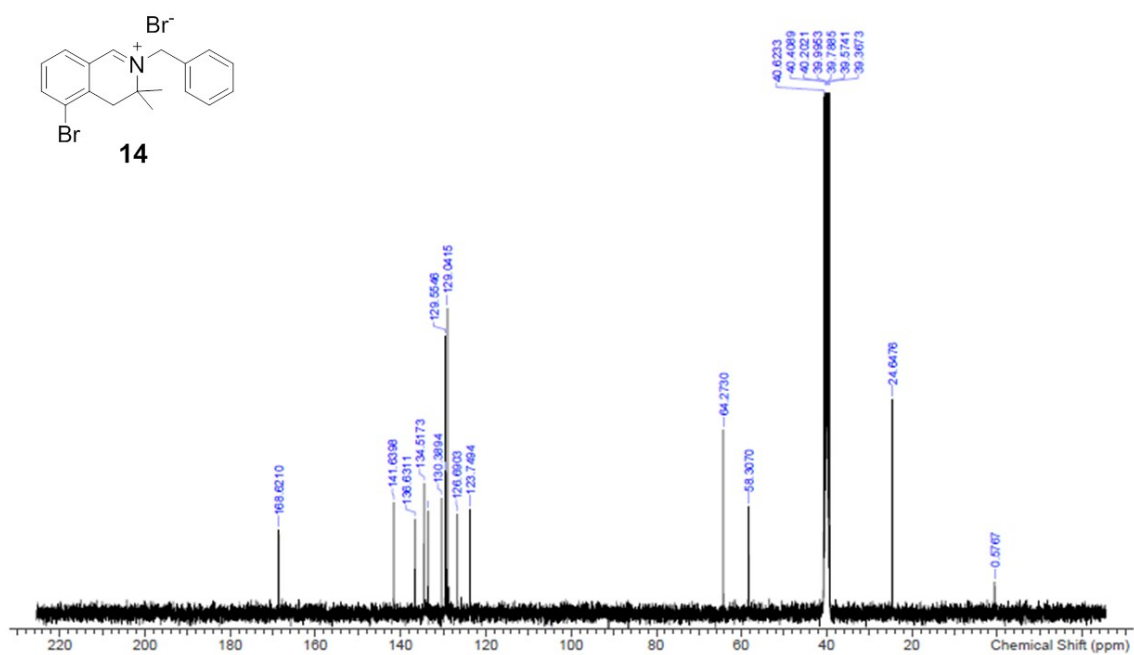

2-Benzyl-5-bromo-3,3-dimethyl-3,4-dihydroisoquinolin-1(2H)-one (15).

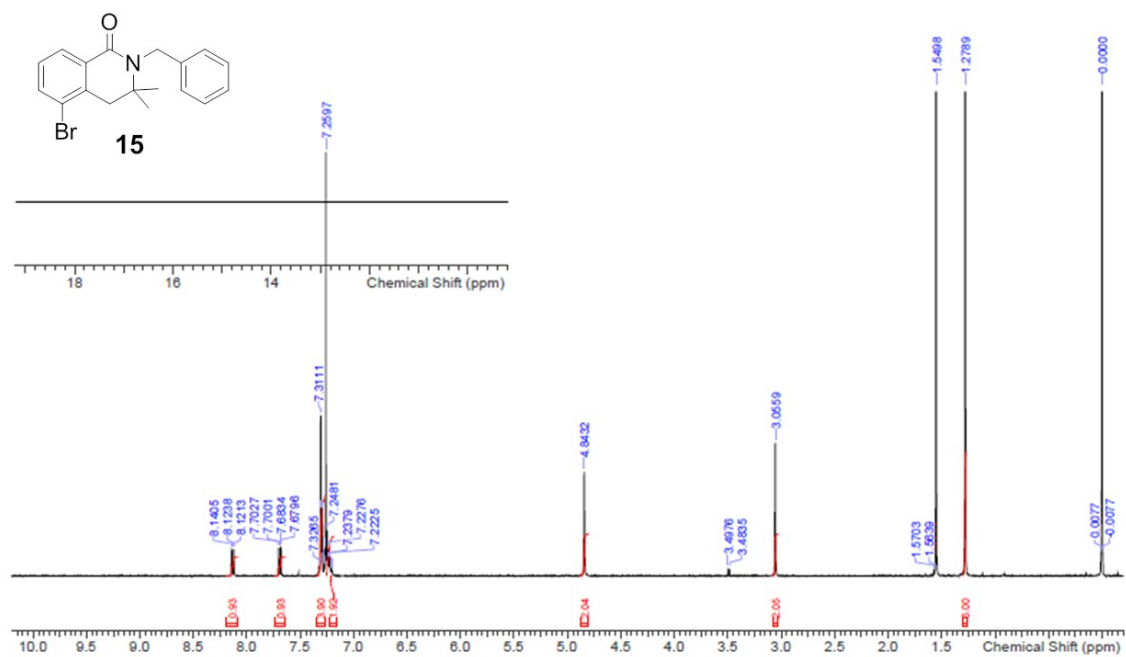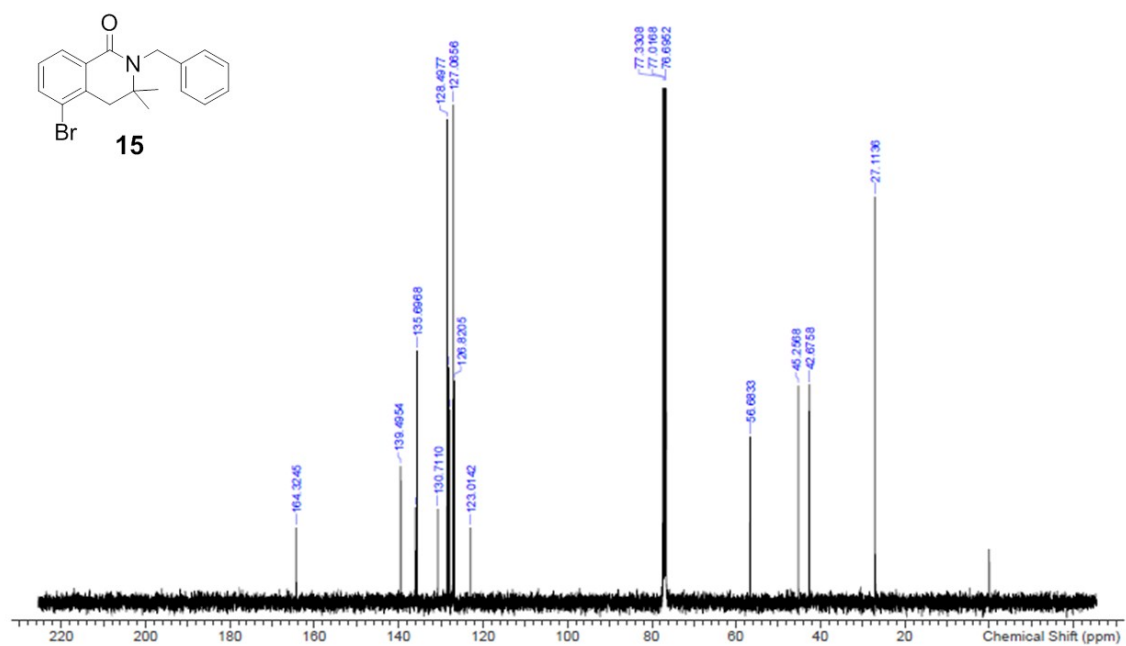

1,2,3,4-tetrahydro-2-methyl-isoquinolinol intermediate(**18**).

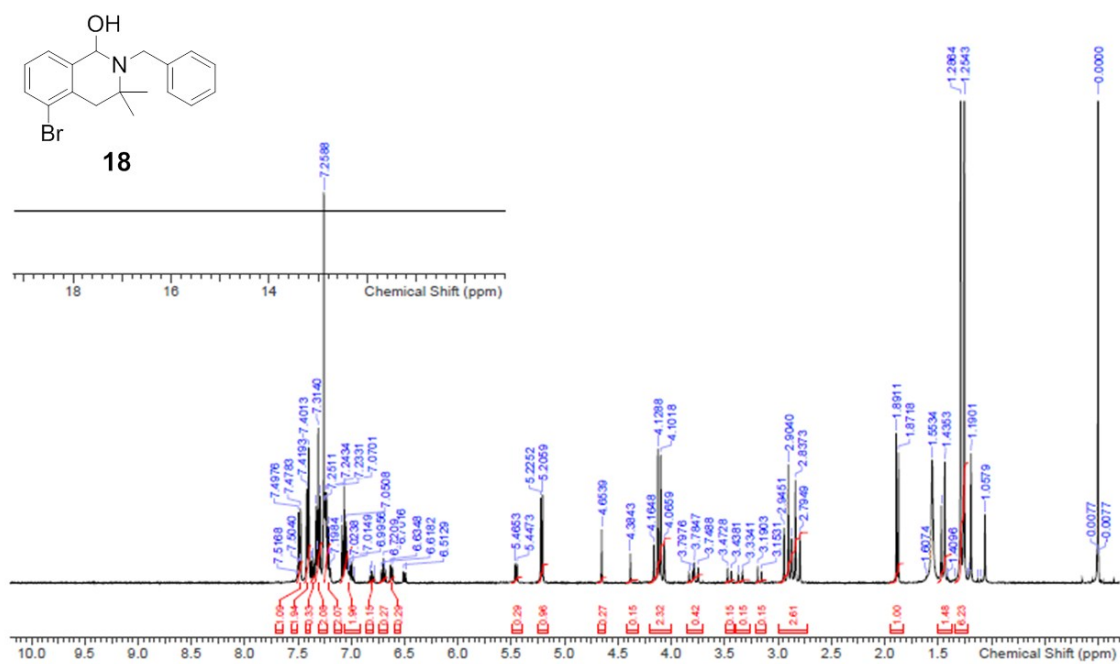

Supplement: c7ra13627g1.pdf [file c7ra13627g1.pdf]
